# Supplementary material for: Connexin 43 and Sonic Hedgehog Pathway Interplay in Glioblastoma Cell Proliferation and Migration
Source: MDPI journal article supplement (doi:10.3390/biology10080767), 2021-08-12
Supplement: s1 [file s1]

# Supplementary Materials

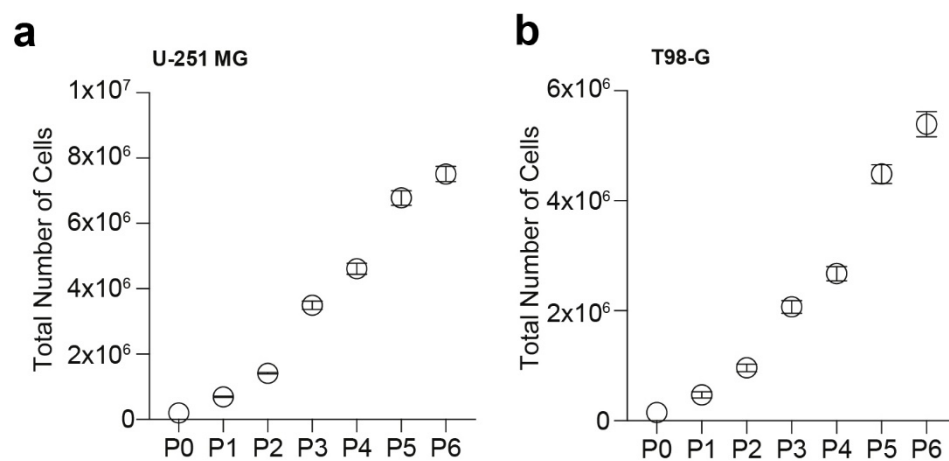

**Figure S1.** Growth curves. (a,b) Growth curve over six passages of human U251-MG (a) and T98-G (b) cell lines. Data are mean  $\pm$  SEM of  $n = 3$  independent cultures. P: passage.

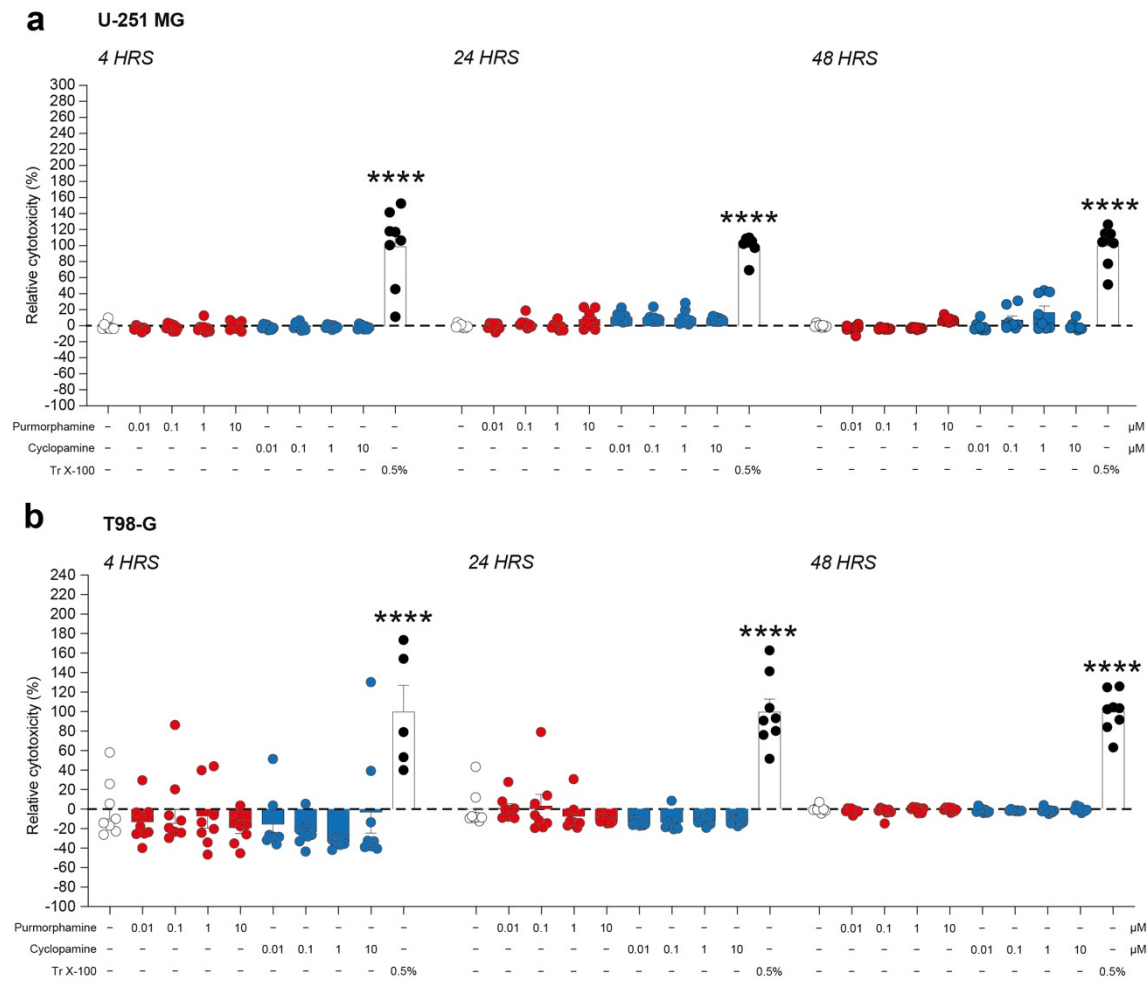

**Figure S2.** Cytotoxicity assay. **(a,b)** Cytotoxicity assay of positive and negative controls of human U251-MG **(a)**, and T98-G **(b)** cell lines and cultures exposed to increasing concentration of purmorphamine and cyclopamine (0.01–10  $\mu$ M). Data are mean  $\pm$  SEM of  $n = 3$  independent experiments; \*\*\*\*  $p$ -value  $< 0.0001$  versus control; one-way ANOVA with Holm–Šidák post-hoc test. Tr X-100: Triton X-100.

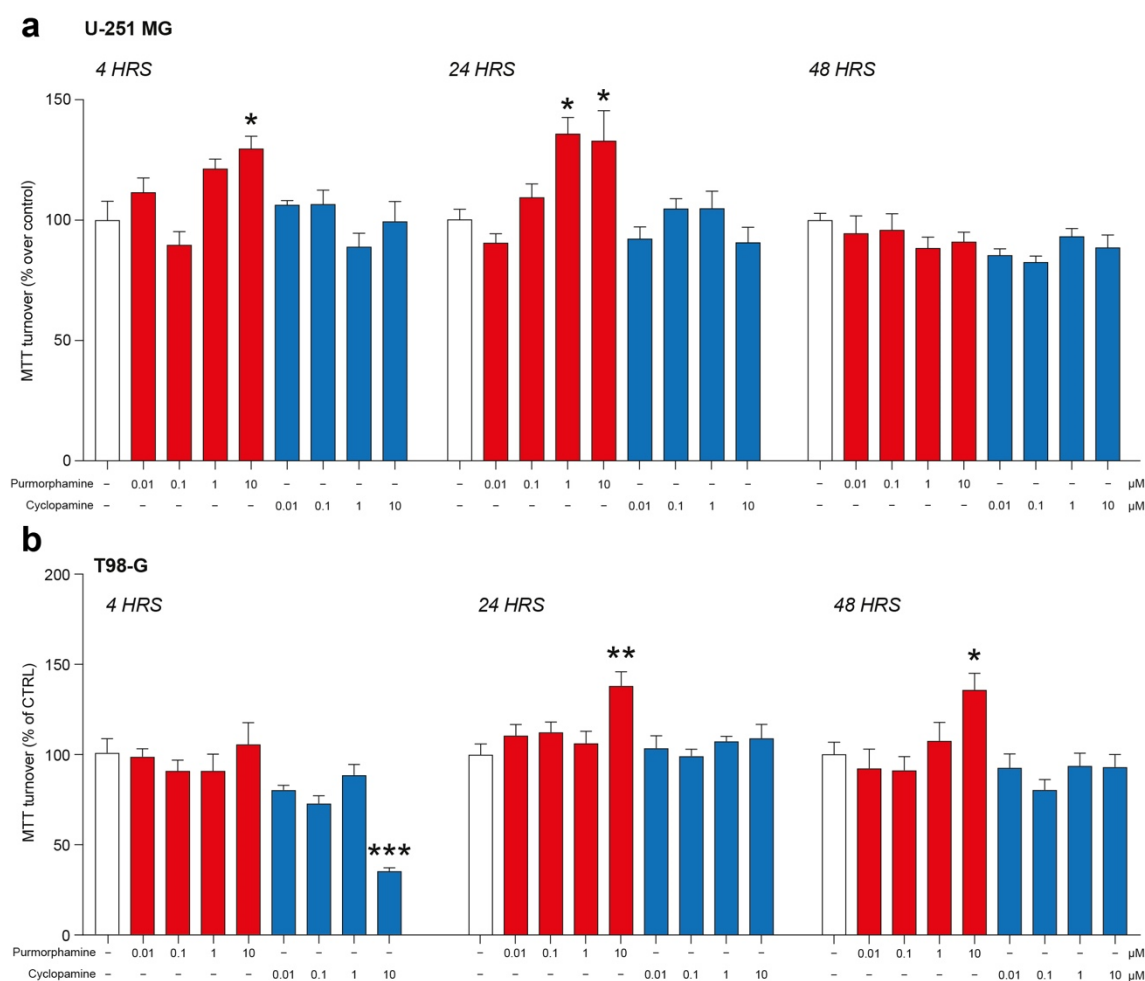

**Figure S3.** MTT turnover assay. (a-b) 3-(4,5-dimethylthiazol-2-yl)-2,5-diphenyltetrazolium bromide (MTT) turnover of control human U251-MG (a) and T98-G (b) cell lines and cultures exposed to increasing concentration of purmorphamine and cyclopamine (0.01–10  $\mu\text{M}$ ). Data are mean  $\pm$  SEM of  $n = 3$  independent experiments; \*p-value < 0.05, \*\*p-value < 0.01 and \*\*\*p-value < 0.001 versus control; one-way ANOVA with Holm–Šidák post-hoc test.

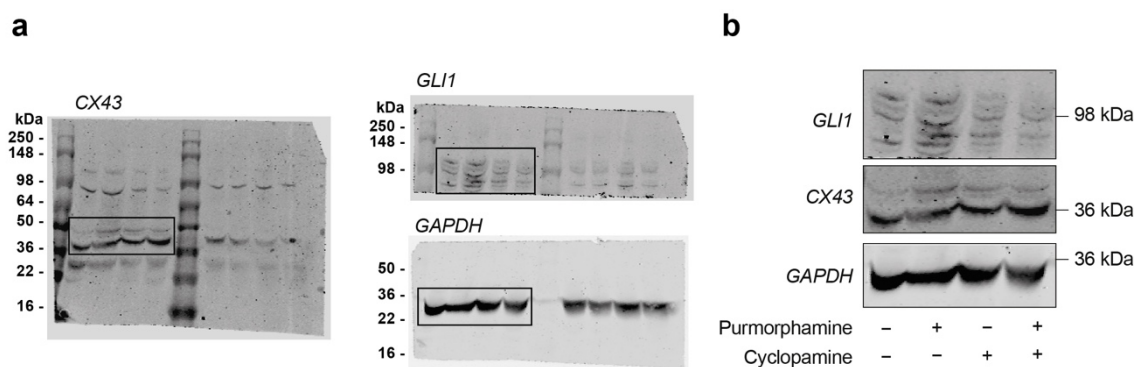

**Figure S4.** Whole Western blot showing all bands. **(a)** Uncropped membranes for CX43, GLI1 and GAPDH. **(b)** Cropped membranes showed in Figure 2c.
